# Supplementary material for: The Application of Arsenic Trioxide in Ameliorating ABT-737 Target Therapy on Uterine Cervical Cancer Cells through Unique Pathways in Cell Death
Source: PubMed Central journal article supplement (PMC7016694; doi:10.3390/cancers12010108), 2019-12-31
Supplement: cancers-12-00108-s001.pdf [file cancers-12-00108-s001.pdf]

## Supplementary Materials

MEF

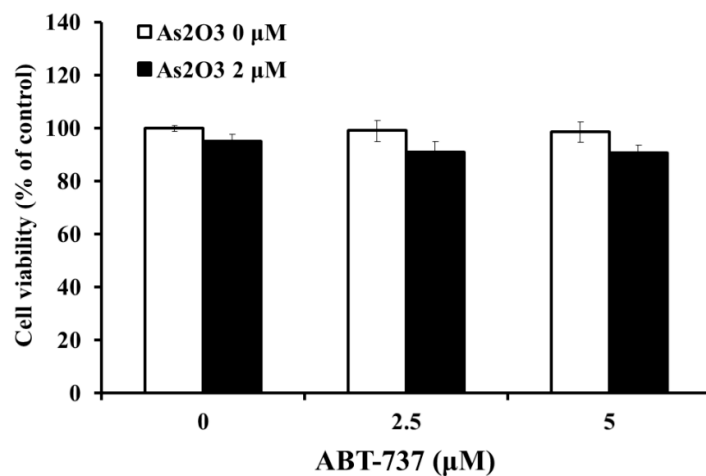

HaCaT

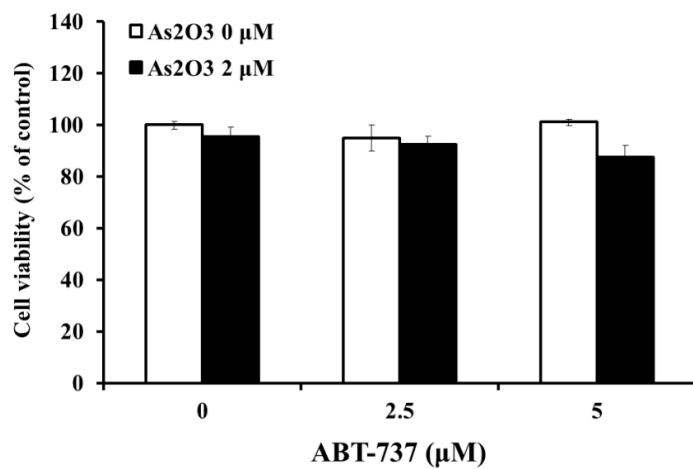

**Figure S1.** Effect of ABT-737 and As<sub>2</sub>O<sub>3</sub> on cell viability in Mouse Embryonic Fibroblasts (MEF) and human keratinocyte cell line, HaCaT. MEF and HaCaT ( $8 \times 10^3$  cells) were treated with ABT-737 and As<sub>2</sub>O<sub>3</sub> for 48 h. The cell viability was analyzed using MTT assay.

SiHa

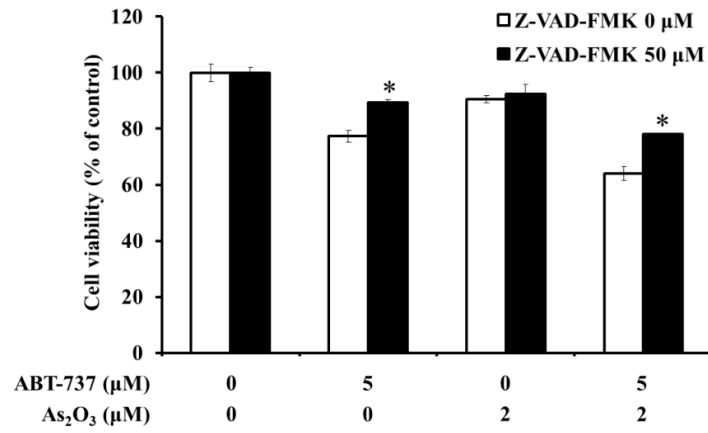

Caski

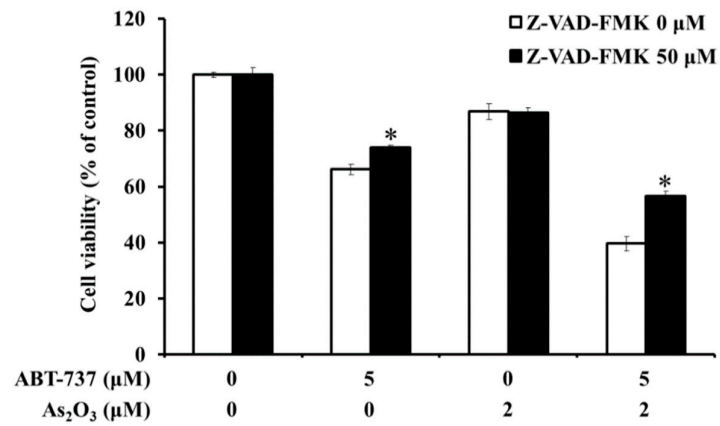

**Figure S2.** Effect of pan-caspase inhibitor Z-VAD-FMK on cell viability in SiHa and Caski cells after ABT-737 and  $\text{As}_2\text{O}_3$  treatment. SiHa and Caski ( $5 \times 10^3$  cells) were treated with Z-VAD-FMK, ABT-737 and  $\text{As}_2\text{O}_3$  for 48 h. The cell viability was analyzed using MTT assay. \*  $p < 0.05$ .

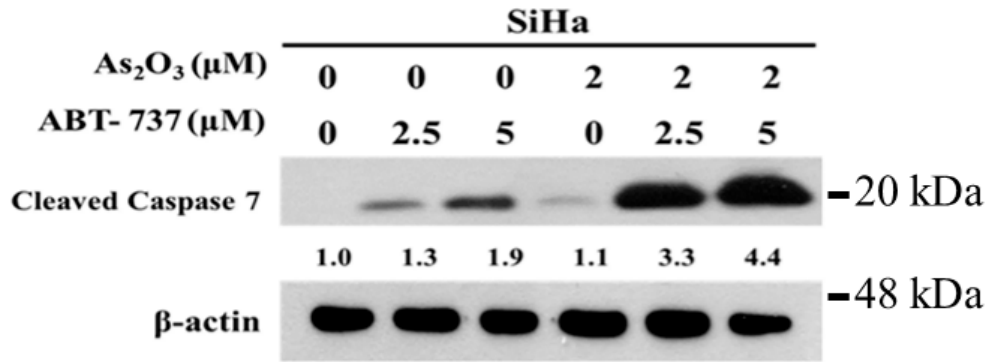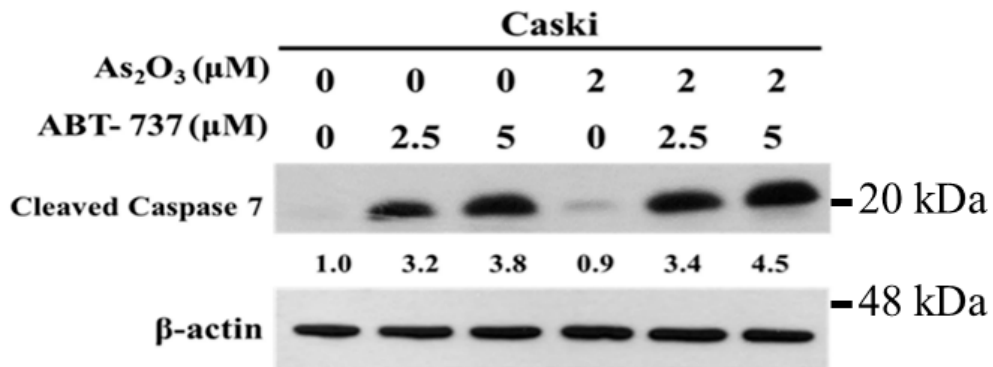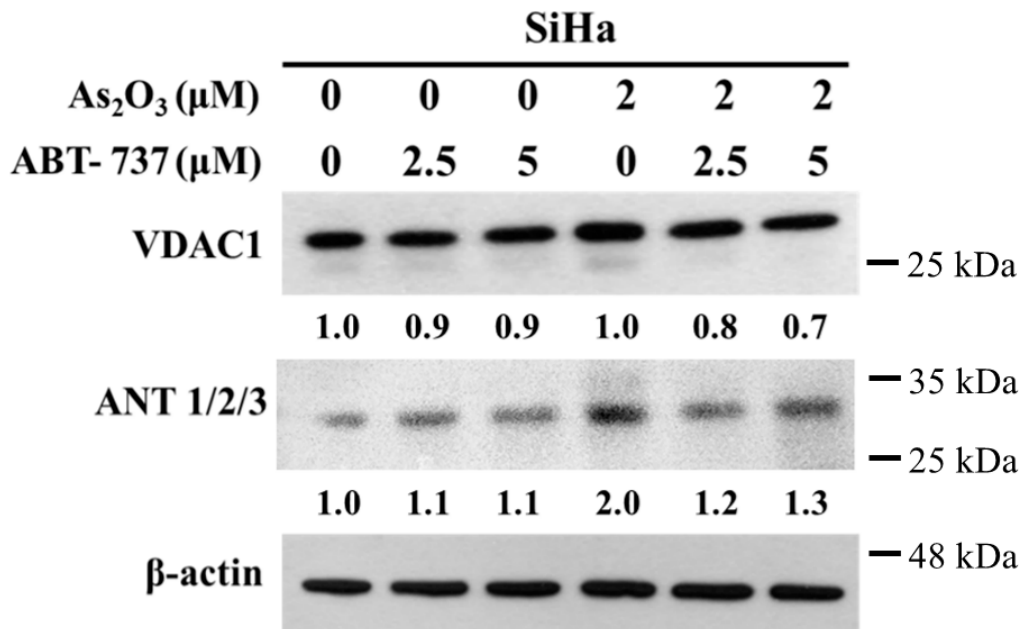

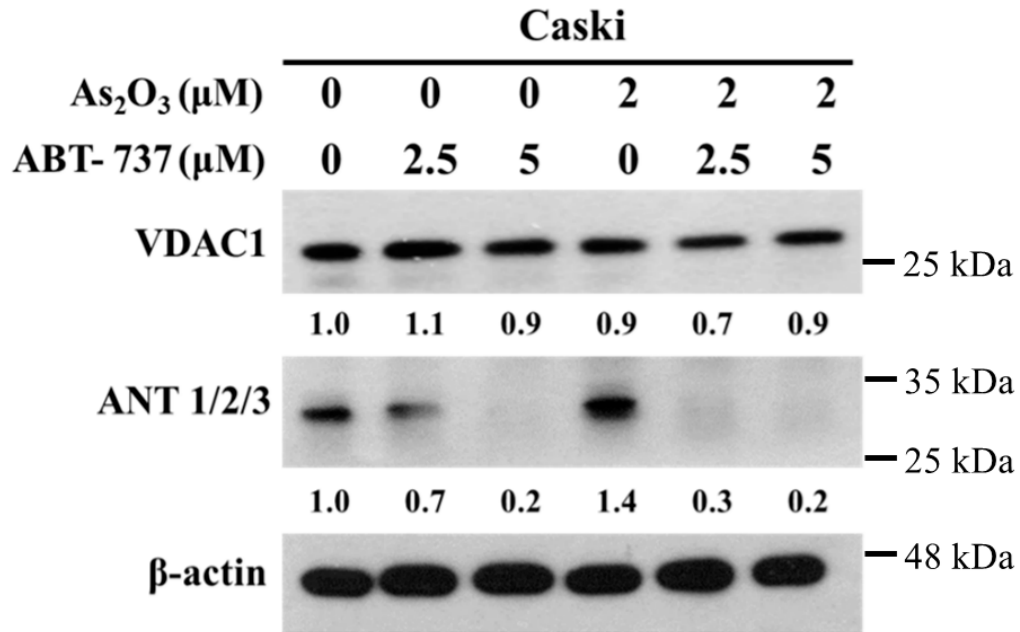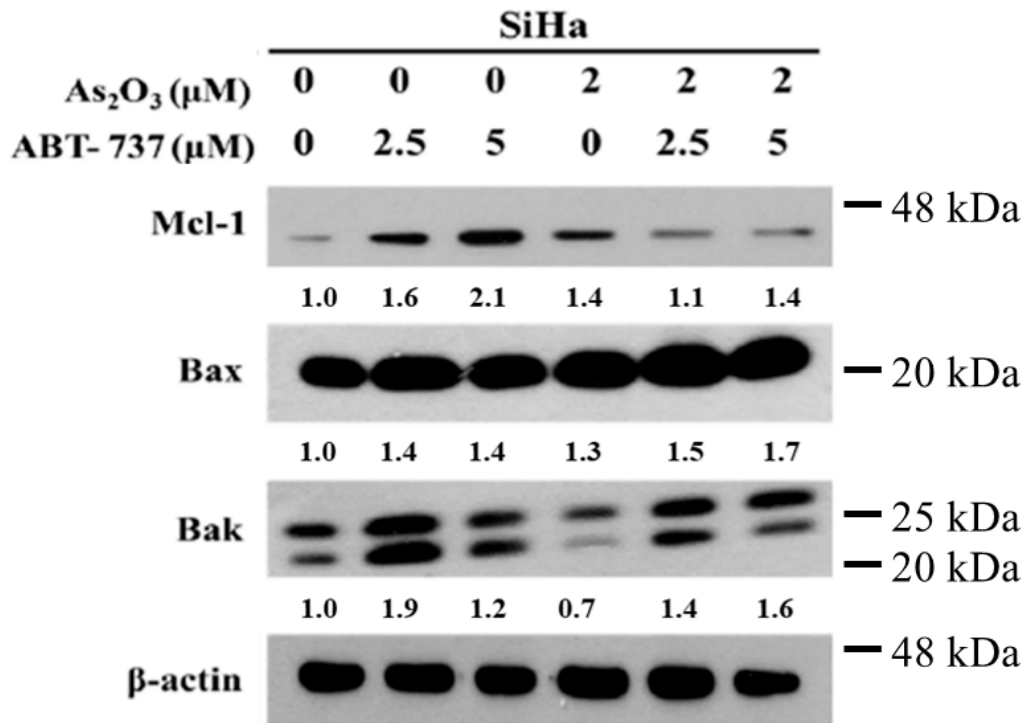

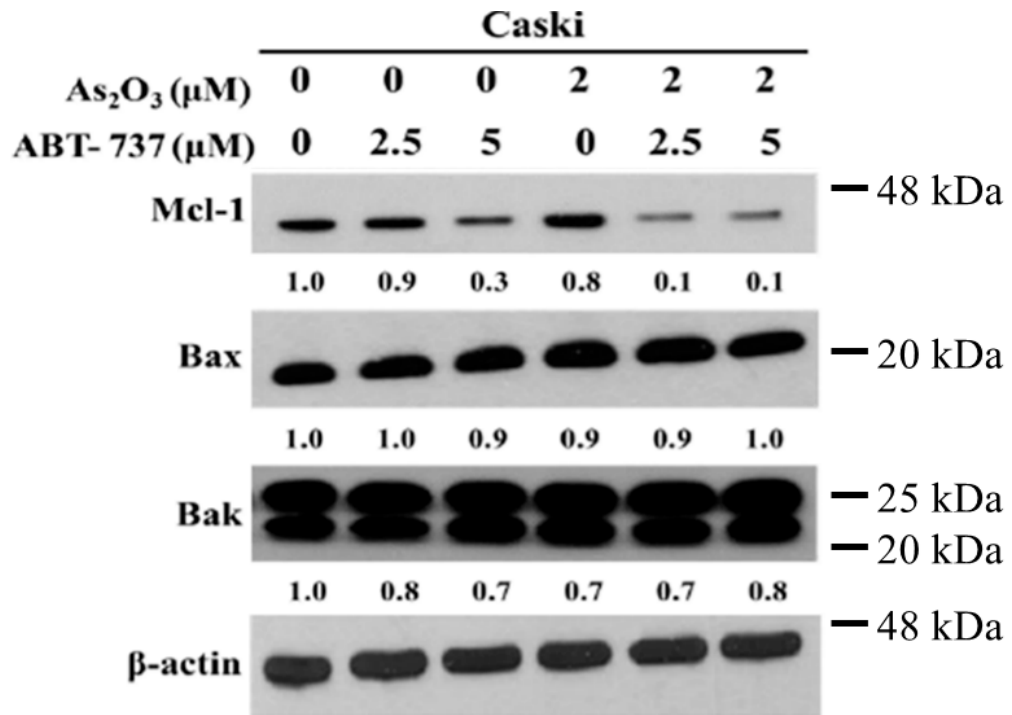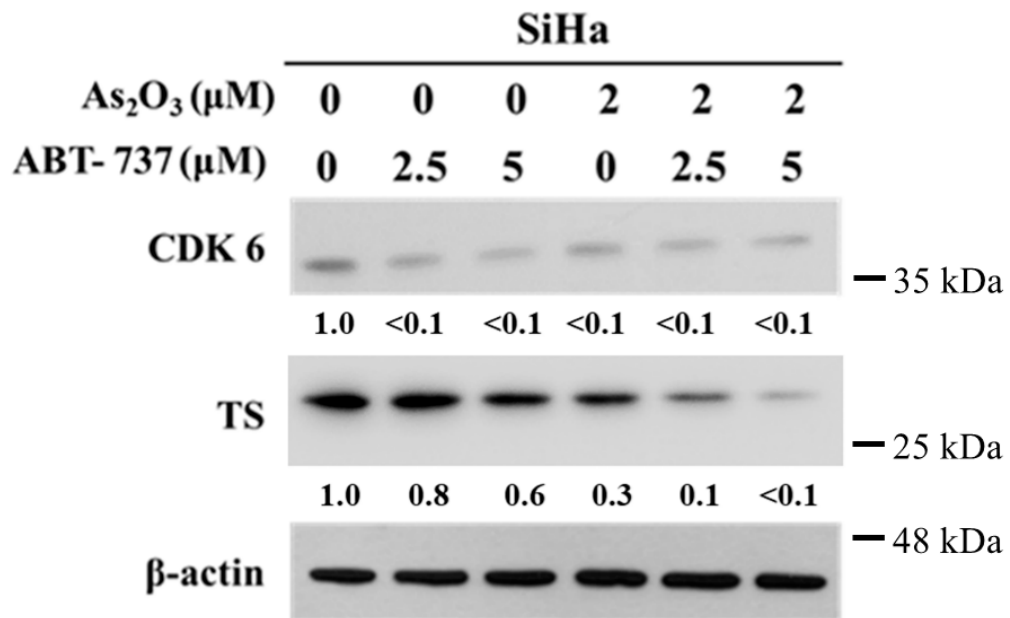

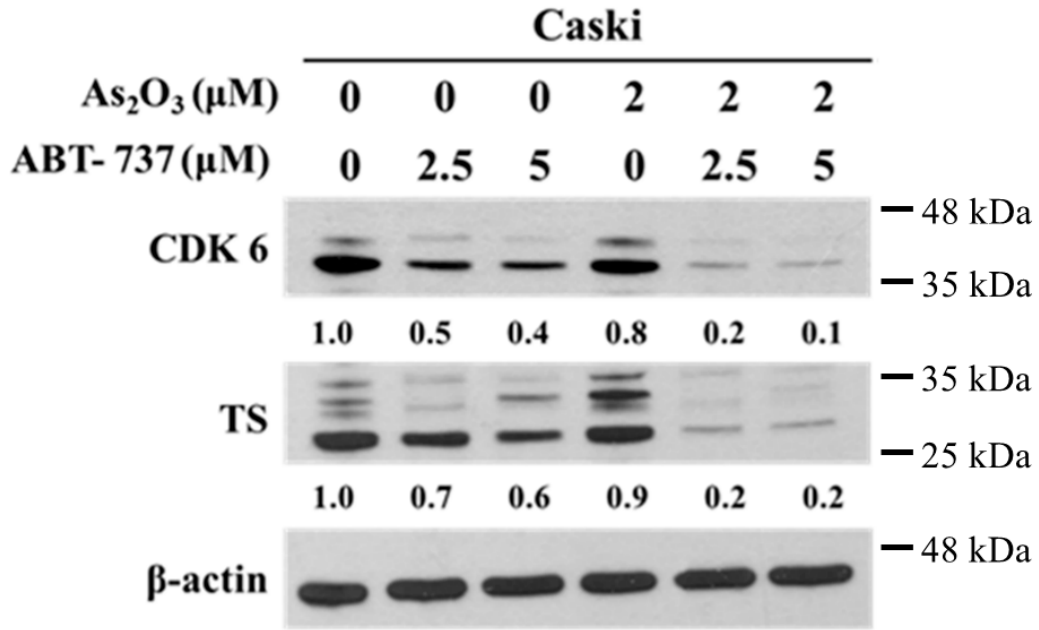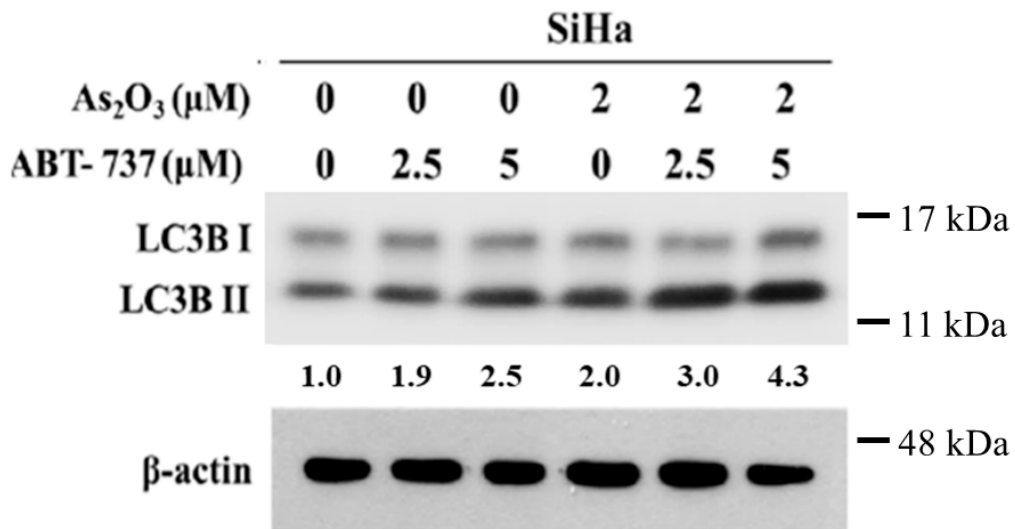

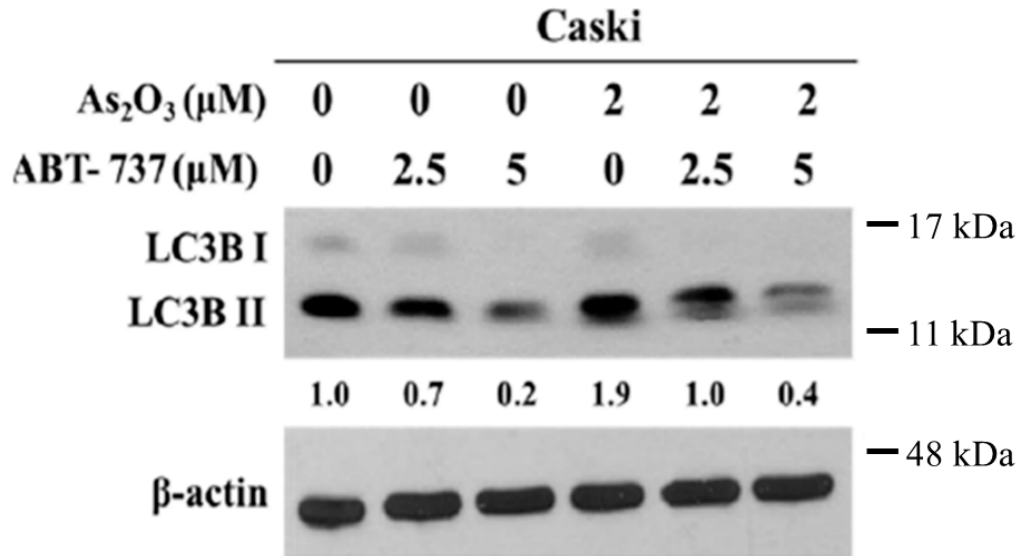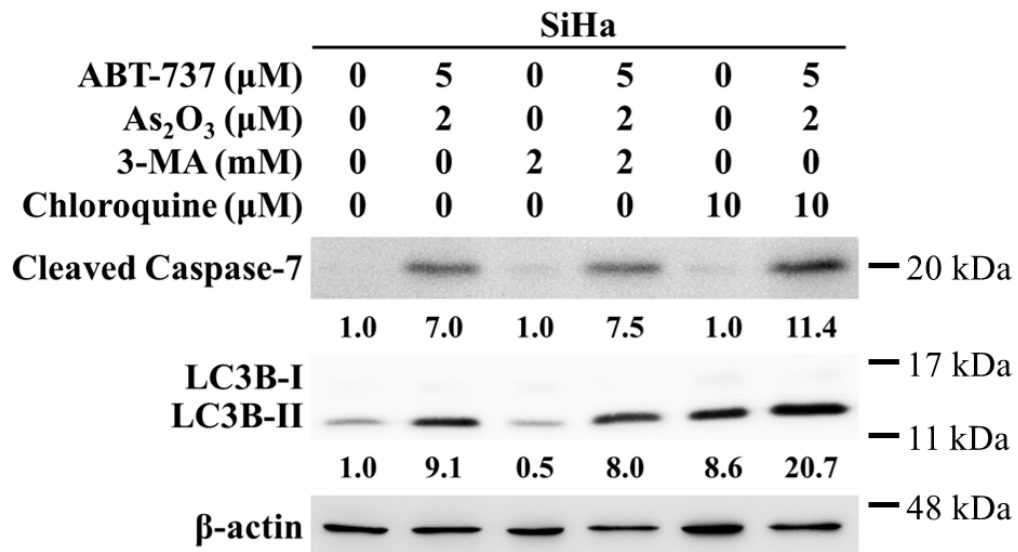

Figure S3. Western blot.
